# Supplementary material for: Assessment of 9-OH- and 7,8-diol-benzo[a]pyrene in Blood as Potent Markers of Cognitive Impairment Related to benzo[a]pyrene Exposure: An Animal Model Study
Source: MDPI journal article supplement (doi:10.3390/toxics9030050), 2021-03-08
Supplement: s1 [file s1]

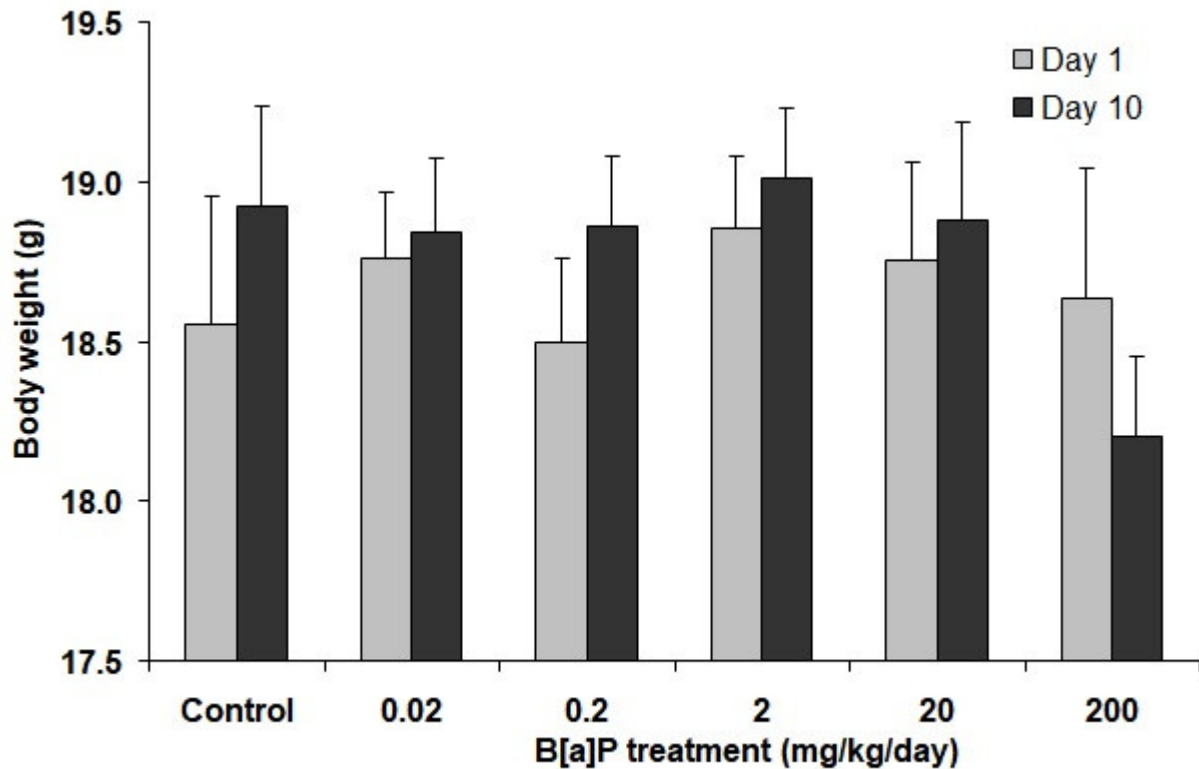

**Figure S1.** Follow up of body weight of B[a]P-exposed mice *via* oral administration at doses ranging from 0.02 to 200 mg/kg for 10 consecutive days. Results were expressed as mean +/- SEM of 10 mice per group.

**Table S1.** Spontaneous alternation performances of B[a]P-exposed mice *via* oral administration at doses ranging from 0.02 to 200 mg/kg for 10 consecutive days in the Y maze. Results were expressed as median (first column) and quartiles (in brackets).

| MWM                             | Control    | 0.02 mg/kg | 0.2 mg/kg  | 2 mg/kg    | 20 mg/kg   | 200 mg/kg  |
|---------------------------------|------------|------------|------------|------------|------------|------------|
| % of spontaneous alternation    | 65 (5-78)  | 60 (5-72)  | 66 (5-70)  | 67 (5-78)  | 62 (4-79)  | 62 (4-75)  |
| Total of arm entries            | 50 (45-58) | 52 (41-65) | 49 (41-60) | 49 (38-60) | 49 (42-57) | 50 (41-65) |
| Number of arms visited (min)    | 5 (5-6)    | 5 (4-7)    | 5 (4-6)    | 5 (4-6)    | 5 (4-6)    | 5 (4-7)    |
| Number of arm entries (1st min) | 9 (5-10)   | 8 (6-10)   | 8 (5-11)   | 8 (6-11)   | 7 (1-10)   | 9 (3-14)   |

**Table S2.** Performances of B[a]P-exposed mice *via* oral administration at doses ranging from 0.02 to 200 mg/kg for 10 consecutive days in the Morris water maze (MWM). Results were expressed as median (first column) and quartiles (in brackets) of 10 mice per group.

| Treatment  | Assay 1     | Assay 2    | Assay 3    | Assay 4    | Assay 5    |
|------------|-------------|------------|------------|------------|------------|
| Control    | 68 (27-92)  | 37 (14-42) | 14 (11-16) | 15 (7-17)  | 36 (19-49) |
| 0.02 mg/kg | 59 (11-135) | 17 (10-39) | 14 (8-17)  | 10 (8-38)  | 19 (14-67) |
| 0.2 mg/kg  | 41 (28-86)  | 23 (17-26) | 14 (10-30) | 30 (5-94)  | 13 (9-64)  |
| 2 mg/kg    | 16 (9-27)   | 11 (9-22)  | 23 (9-29)  | 10 (8-18)  | 19 (9-31)  |
| 20 mg/kg   | 18 (10-59)  | 16 (6-22)  | 21 (7-67)  | 8 (5-10)   | 6 (4-7)    |
| 200 mg/kg  | 20 (12-25)  | 11 (7-23)  | 17 (6-41)  | 20 (12-27) | 19 (9-55)  |
